# Supplementary material for: Discovery and Putative Perception Mechanisms of Novel Umami Peptides from Ruditapes philippinarum Cooking Liquid: In Silico Screening, Molecular Docking, Sensory Evaluation, and STC-1 Cell-Based Validation
Source: MDPI journal article supplement (doi:10.3390/molecules31122193), 2026-06-22
Supplement: s1 [file molecules-4361993-supplementary.pdf › molecules-4361993-supplementary.pdf]

## Supplementary materials

### **Discovery and putative perception mechanisms of novel umami peptides from *Ruditapes philippinarum* cooking liquid: *In silico* screening, molecular docking, sensory evaluation, and STC-1 cell-based validation**

**Ruiying Wang <sup>1,2</sup>, Qi Sun <sup>1</sup>, Siyu Zhang <sup>1</sup>, Haibo Wang <sup>1,2</sup>, Tanye Xu <sup>1,2</sup>, Qiancheng Zhao <sup>1,2</sup> and Zhibo Li <sup>1,2,\*</sup>**

<sup>1</sup> College of Food Science and Engineering, Dalian Ocean University, Dalian, 116023, China;

<sup>2</sup> Dalian Key Laboratory of Marine Bioactive Substances Development and High Value Utilization, Dalian, 116023, China;

\* Correspondence: lzb@dlou.edu.cn; Tel.: +86 13504259648

**Table S1** Liquid chromatographic gradient

| Time (min) | A (%) | B (%) |
|------------|-------|-------|
| Initial    | 95.0  | 5.0   |
| 1.0        | 95.0  | 5.0   |
| 46.0       | 70.0  | 30.0  |
| 47.0       | 20.0  | 80.0  |
| 49.0       | 20.0  | 80.0  |
| 50.0       | 95.0  | 5.0   |
| 55.0       | 95.0  | 5.0   |

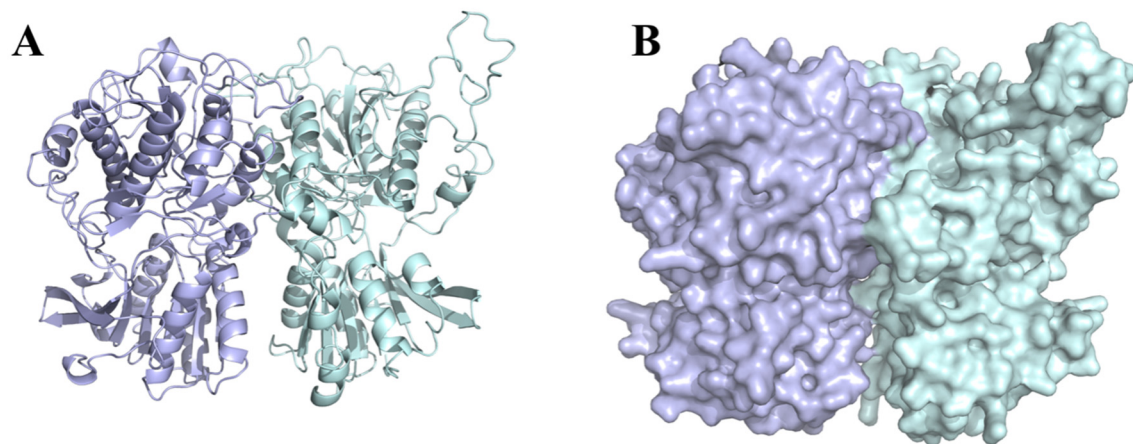

**Figure S1** Homology modeling 3D representation of the umami receptor T1R1/T1R3 (A) 3D surface view (B).

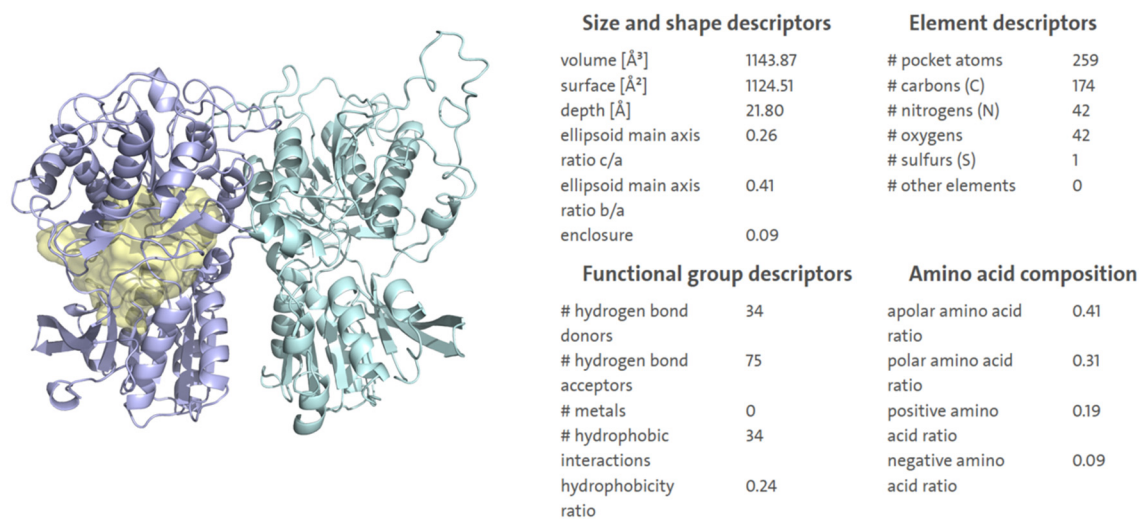

**Figure S2** Analysis of the potential binding pocket and physicochemical parameters of the umami receptor T1R1/T1R3

**Table S2** The database identified 62 peptides that exhibited potential umami activity.

| Peptide ID | Peptide Sequence | Taste | Peptide ID | Peptide Sequence | Taste |
|------------|------------------|-------|------------|------------------|-------|
| sequence1  | AMYLQDVDAAY      | umami | sequence32 | RQK              | umami |
| sequence2  | DNQ              | umami | sequence33 | RQT              | umami |
| sequence3  | DRL              | umami | sequence34 | RRK              | umami |
| sequence4  | DSFVHGNSGA       | umami | sequence35 | SEF              | umami |
| sequence5  | EAF              | umami | sequence36 | SHE              | umami |
| sequence6  | EAY              | umami | sequence37 | SKH              | umami |
| sequence7  | EEE              | umami | sequence38 | SRL              | umami |
| sequence8  | EGF              | umami | sequence39 | SRPA             | umami |
| sequence9  | ENK              | umami | sequence40 | TDW              | umami |
| sequence10 | ESF              | umami | sequence41 | TED              | umami |
| sequence11 | FKTDLRFQ         | umami | sequence42 | TFE              | umami |
| sequence12 | FVE              | umami | sequence43 | TPR              | umami |
| sequence13 | GEAF             | umami | sequence44 | TQDTVVALDA       | umami |
| sequence14 | GFR              | umami | sequence45 | TQK              | umami |
| sequence15 | HDD              | umami | sequence46 | TRS              | umami |
| sequence16 | HDQ              | umami | sequence47 | TSR              | umami |
| sequence17 | HFTK             | umami | sequence48 | TTR              | umami |
| sequence18 | KEY              | umami | sequence49 | TVPIYEGY         | umami |
| sequence19 | LTE              | umami | sequence50 | VDY              | umami |
| sequence20 | NDD              | umami | sequence51 | VEEGIFQNP        | umami |
| sequence21 | PKE              | umami | sequence52 | VEL              | umami |
| sequence22 | PPPD             | umami | sequence53 | VEM              | umami |
| sequence23 | QARV             | umami | sequence54 | VEYA             | umami |
| sequence24 | QHQ              | umami | sequence55 | VKM              | umami |
| sequence25 | QKS              | umami | sequence56 | VKN              | umami |
| sequence26 | QLK              | umami | sequence57 | VQE              | umami |
| sequence27 | QNT              | umami | sequence58 | VRC              | umami |
| sequence28 | RGK              | umami | sequence59 | WGE              | umami |
| sequence29 | RLK              | umami | sequence60 | YGK              | umami |
| sequence30 | RND              | umami | sequence61 | YKD              | umami |
| sequence31 | RQA              | umami | sequence62 | YSK              | umami |

**Table S3** Physicochemical properties screening results of umami peptides.

| Peptide ID | Peptide Sequence | Toxin     | Water solubility | Allergenicity | Length | Umami segments | Umami frequency | Reported |
|------------|------------------|-----------|------------------|---------------|--------|----------------|-----------------|----------|
| sequence1  | VEEGIFQNP        | Non-Toxin | good             | Non-Allergen  | 9      | E/EG/VE/NP     | 0.7778          | /        |
| sequence2  | EAY              | Non-Toxin | good             | Non-Allergen  | 3      | E/EA           | 0.6667          | /        |
| sequence3  | KEY              | Non-Toxin | good             | Non-Allergen  | 3      | E/EY           | 0.6667          | /        |
| sequence4  | ESF              | Non-Toxin | good             | Non-Allergen  | 3      | E/ES           | 0.6667          | /        |
| sequence5  | LTE              | Non-Toxin | good             | Non-Allergen  | 3      | E/TE           | 0.6667          | /        |
| sequence6  | VDY              | Non-Toxin | good             | Non-Allergen  | 3      | D/VD           | 0.6667          | /        |
| sequence7  | GEAF             | Non-Toxin | good             | Non-Allergen  | 4      | E/EA           | 0.5             | /        |
| sequence8  | VEM              | Non-Toxin | good             | Non-Allergen  | 3      | E/VE           | 0.4999          | /        |
| sequence9  | TQDTVVALDA       | Non-Toxin | good             | Non-Allergen  | 10     | D/VV/DA        | 0.4             | /        |
| sequence10 | AMYLQDVDAAY      | Non-Toxin | good             | Non-Allergen  | 11     | D/VD/DA        | 0.3636          | /        |
| sequence11 | TED              | Non-Toxin | good             | Non-Allergen  | 3      | E/D            | 0.3333          | /        |
| sequence12 | TFE              | Non-Toxin | good             | Non-Allergen  | 3      | E              | 0.3333          | /        |
| sequence13 | SHE              | Non-Toxin | good             | Non-Allergen  | 3      | E              | 0.3333          | /        |
| sequence14 | VEL              | Non-Toxin | good             | Non-Allergen  | 3      | EL             | 0.3333          | /        |
| sequence15 | NDD              | Non-Toxin | good             | Non-Allergen  | 3      | D              | 0.3333          | /        |
| sequence16 | EEE              | Non-Toxin | good             | Non-Allergen  | 3      | E/EE/EEE       | 0.3333          | /        |
| sequence17 | ENK              | Non-Toxin | good             | Non-Allergen  | 3      | E              | 0.3333          | /        |
| sequence18 | VQE              | Non-Toxin | good             | Non-Allergen  | 3      | E              | 0.3333          | /        |
| sequence19 | HDD              | Non-Toxin | good             | Non-Allergen  | 3      | D/DD           | 0.3333          | /        |
| sequence20 | RND              | Non-Toxin | good             | Non-Allergen  | 3      | D              | 0.3333          | /        |
| sequence21 | DRL              | Non-Toxin | good             | Non-Allergen  | 3      | D              | 0.3333          | /        |
| sequence22 | HDQ              | Non-Toxin | good             | Non-Allergen  | 3      | D              | 0.3333          | /        |

| Peptide ID | Peptide Sequence | Toxin     | Water solubility | Allergenicity | Length | Umami segments | Umami frequency | Reported                    |
|------------|------------------|-----------|------------------|---------------|--------|----------------|-----------------|-----------------------------|
| sequence23 | VKM              | Non-Toxin | good             | Non-Allergen  | 3      | E              | 0.3333          | /                           |
| sequence24 | YKD              | Non-Toxin | good             | Non-Allergen  | 3      | D              | 0.3333          | /                           |
| sequence25 | SEF              | Non-Toxin | good             | Non-Allergen  | 3      | E              | 0.3333          | /                           |
| sequence26 | FVE              | Non-Toxin | good             | Non-Allergen  | 3      | E/VE           | 0.3333          | /                           |
| sequence27 | DNQ              | Non-Toxin | good             | Non-Allergen  | 3      | D              | 0.3333          | /                           |
| sequence28 | TDW              | Non-Toxin | good             | Non-Allergen  | 3      | D              | 0.3333          | /                           |
| sequence29 | VEYA             | Non-Toxin | good             | Non-Allergen  | 4      | E/VE/EY        | 0.25            | /                           |
| sequence30 | PPPD             | Non-Toxin | good             | Non-Allergen  | 4      | D              | 0.25            | /                           |
| sequence31 | TVPIYEGY         | Non-Toxin | good             | Non-Allergen  | 9      | E/EG           | 0.25            | /                           |
| sequence32 | FKTDLRFQ         | Non-Toxin | good             | Non-Allergen  | 8      | D              | 0.125           | /                           |
| sequence33 | DSFVHGNSGA       | Non-Toxin | good             | Non-Allergen  | 10     | D              | 0.1             | /                           |
| sequence34 | EGF              | Non-Toxin | good             | Non-Allergen  | 3      | E/EG           | 0.6667          | Aspergillus oryzae HN 3.042 |
| sequence35 | EAF              | Non-Toxin | good             | Non-Allergen  | 3      | E/EA           | 0.6667          | Mushroom                    |

**Table S4** Docking energies of umami peptides with umami receptor

|    | NAME        | "-CDOCKER_ENERGY"<br>(Kcal/mol) | "-CDOCKER__INTERACTION_ENERGY"<br>(Kcal/mol) |
|----|-------------|---------------------------------|----------------------------------------------|
| 1  | DSFVHGNSGA  | 162.25                          | 116.02                                       |
| 2  | AMYLQDVDAAY | 146.26                          | 115.12                                       |
| 3  | TQDTVVALDA  | 141.89                          | 109.63                                       |
| 4  | YKD         | 107.02                          | 74.77                                        |
| 5  | GEAF        | 98.85                           | 58.82                                        |
| 6  | KEY         | 95.55                           | 74.65                                        |
| 7  | RND         | 88.47                           | 75.95                                        |
| 8  | DRL         | 88.09                           | 62.21                                        |
| 9  | ENK         | 87.94                           | 54.24                                        |
| 10 | VEYA        | 87.63                           | 52.48                                        |
| 11 | VKM         | 86.72                           | 84.15                                        |
| 12 | DNQ         | 82.32                           | 58.36                                        |
| 13 | EAY         | 81.45                           | 55.25                                        |
| 14 | VEL         | 80.89                           | 57.46                                        |
| 15 | VEM         | 80.29                           | 61.84                                        |
| 16 | HDQ         | 79.54                           | 62.06                                        |
| 17 | SHE         | 79.15                           | 54.60                                        |
| 18 | FVE         | 78.81                           | 53.77                                        |
| 19 | VQE         | 78.70                           | 53.63                                        |
| 20 | SEF         | 77.99                           | 54.17                                        |
| 21 | VDY         | 77.95                           | 60.65                                        |
| 22 | NDD         | 76.93                           | 50.86                                        |
| 23 | TFE         | 76.34                           | 58.70                                        |
| 24 | EEE         | 76.31                           | 55.97                                        |
| 25 | TDW         | 76.00                           | 62.86                                        |
| 26 | TED         | 75.92                           | 49.82                                        |
| 27 | HDD         | 75.50                           | 52.90                                        |
| 28 | LTE         | 75.22                           | 52.30                                        |
| 29 | TVPIYEGY    | 73.10                           | 92.64                                        |
| 30 | ESF         | 72.85                           | 49.20                                        |
| 31 | PPPD        | 32.42                           | 64.90                                        |
| 32 | VEEGIFQNP   | -                               | -                                            |
| 33 | FKTDLRFQ    | -                               | -                                            |

Note: "-" indicates unsuccessful connection.



**Table S5** Primer sequences for real-time fluorescence quantitative PCR

|               | Gene name | Primer name | Primers sequence (5'-3') |
|---------------|-----------|-------------|--------------------------|
| Guardian gene | GAPDH     | F           | TGATGGGTGTGAACCACGAG     |
|               | GAPDH     | R           | GCCCTTCCACAATGCCAAAG     |
| Target gene   | T1R1      | F           | TCACGCTTTCACGACATGGA     |
|               | T1R1      | R           | AGGTCCCAGAGGTACATCCC     |
|               | T1R3      | F           | CAGTCAAAGCATTGCTGCCT     |
|               | T1R3      | R           | ATAGCTGACCTGTGGCATGA     |
|               | CasR      | F           | AGGCCCAGAAGAGCAATGAC     |
|               | CasR      | R           | TATTTCTGGCTGGTGGTCCC     |
|               | GPRC6a    | F           | TCCGGAGTCAAGCTGGGATA     |
|               | GPRC6a    | R           | CCCTTGGCATGTAGCTGGAA     |
